# Supplementary material for: High-performance hybrid supercapacitors enabled by CoTe@CoFeTe double-shelled nanocubes
Source: Royal Society of Chemistry journal article supplement (doi:10.1039/d4nr03996c), 2024-12-30
Supplement: d4nr03996c1.pdf [file d4nr03996c1.pdf]

## Supporting Information

# High-performance hybrid supercapacitors enabled by CoTe@CoFeTe double-shelled nanocubes

Helya Gholami Shamami,<sup>1</sup> Akbar Mohammadi Zardkhoshoui<sup>2\*</sup> and Saied Saeed Hosseiny Davarani<sup>1\*</sup>

<sup>1</sup>Department of Chemistry, Shahid Beheshti University, G. C., 1983963113, Evin, Tehran, Iran.

<sup>2</sup>Department of Chemical Technologies, Iranian Research Organization for Science and Technology (IROST), Tehran 3313193685, Iran.

Corresponding authors: \*<sup>1</sup>Tel: +98 21 22431661; Fax: +98 21 22431661; E-mail: [ss-hosseiny@sbu.ac.ir](mailto:ss-hosseiny@sbu.ac.ir) (S.S.H. Davarani) and \*<sup>2</sup>Tel: +98 21 56276283; Fax: +98 21 56276265; E-mail: [A\\_mohammadi@irost.ir](mailto:A_mohammadi@irost.ir) (A. Mohammadi Zardkhoshoui).

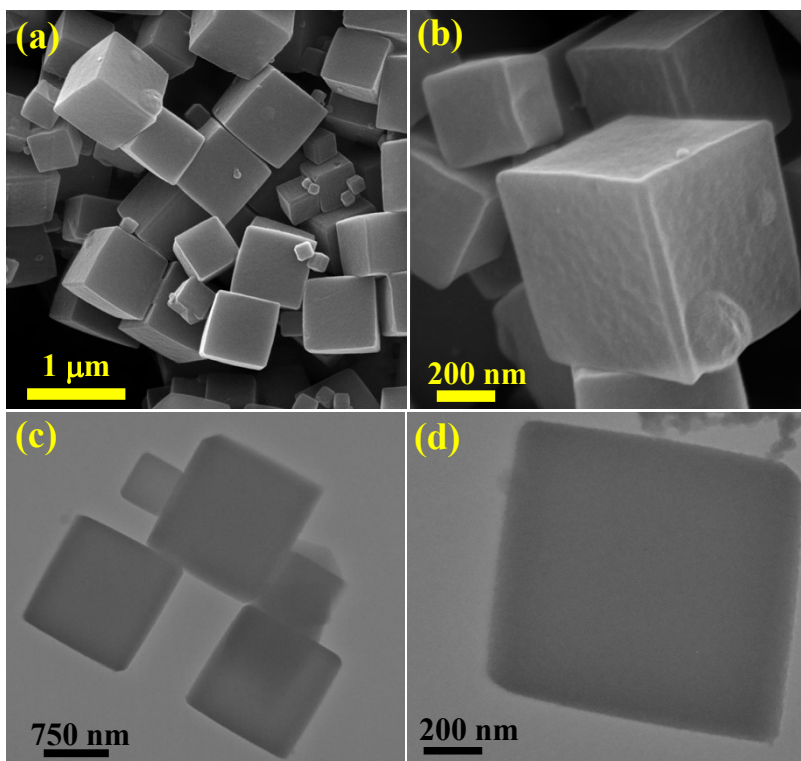

**Fig. S1** (a, b) FESEM images of the ZIF67. (c, d) TEM images of the ZIF67.

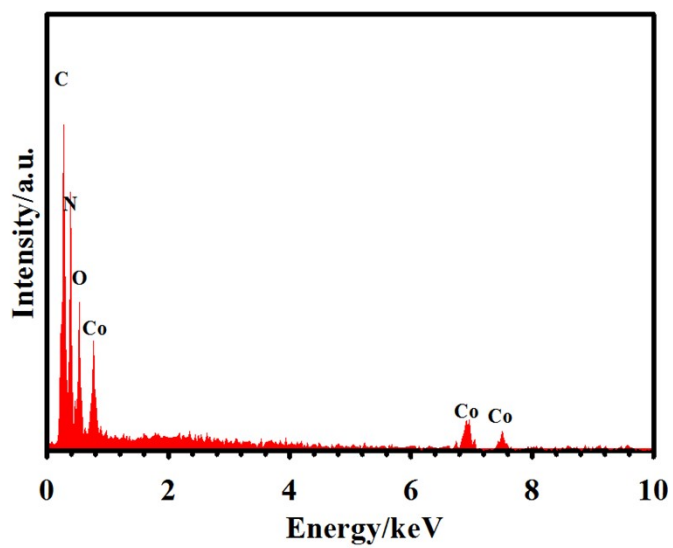

**Fig. S2** EDX spectrum of the ZIF67.

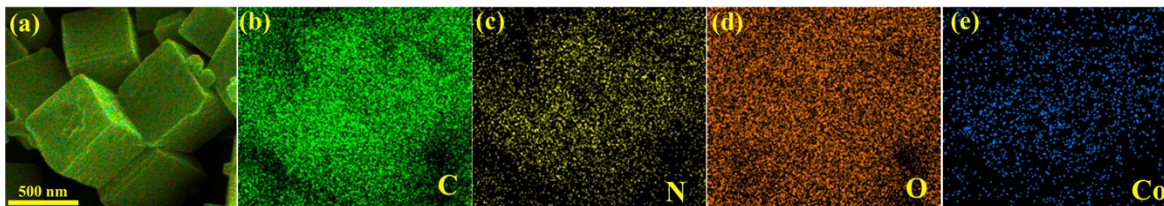

**Fig. S3** FE-SEM mapping images of the ZIF67.

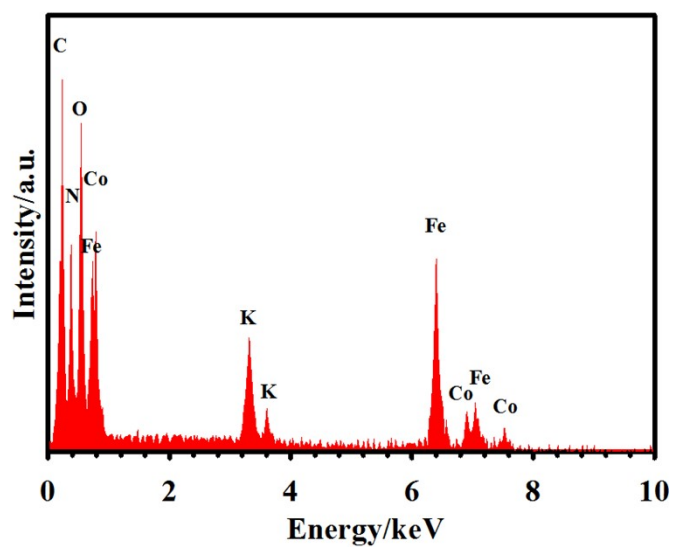

**Fig. S4** EDX spectrum of the ZIF67@CoFe-PBA.

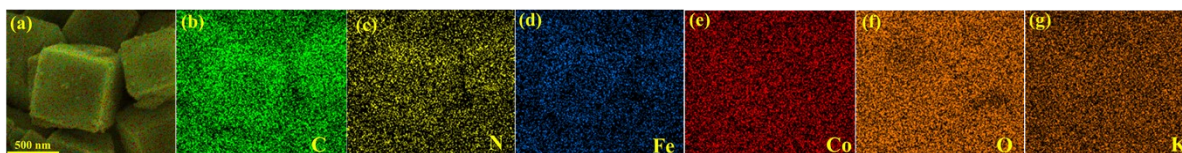

**Fig. S5** FE-SEM mapping images of the ZIF67@CoFe-PBA.

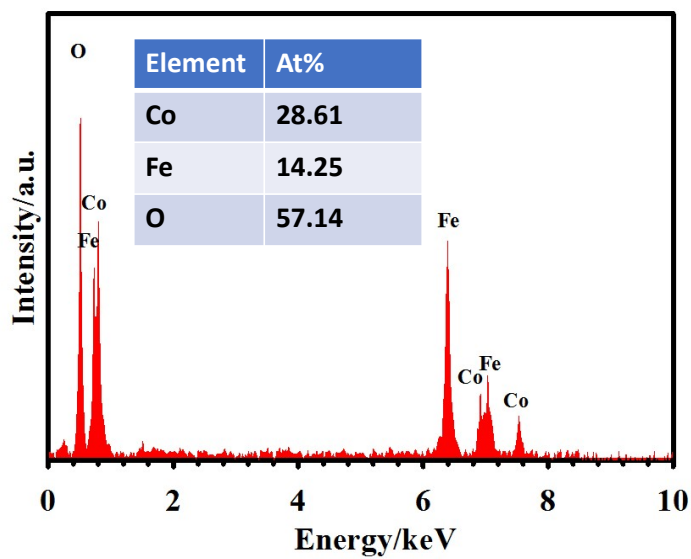

Fig. S6 EDX spectrum of the  $\text{Co}_3\text{O}_4@\text{CoFe}_2\text{O}_4$ .

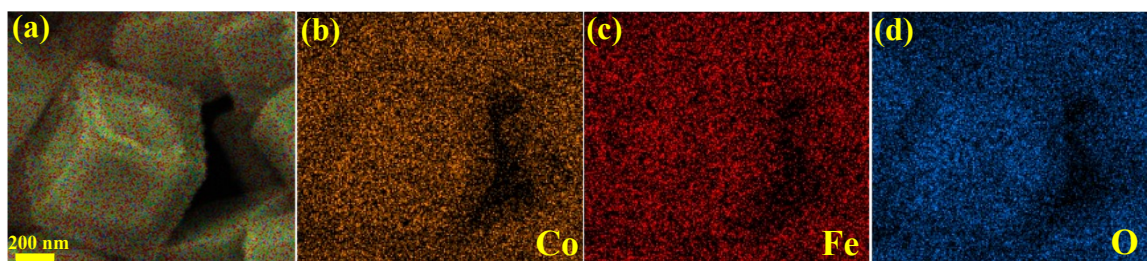

Fig. S7 FE-SEM mapping images of the  $\text{Co}_3\text{O}_4@\text{CoFe}_2\text{O}_4$ .

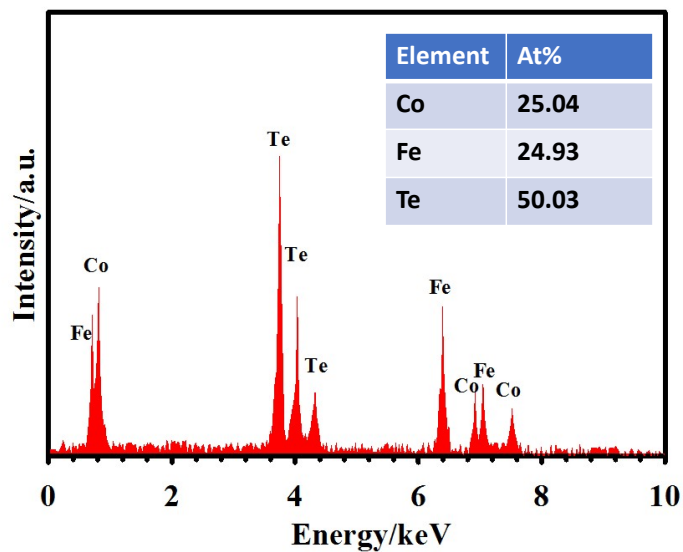

Fig. S8 EDX spectrum of the  $\text{CoTe}@\text{CoFeTe}$ .

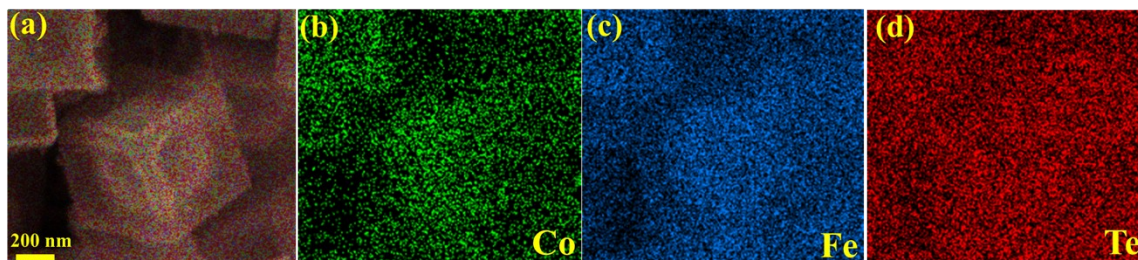

**Fig. S9** FESEM mapping images of the CoTe@CoFeTe.

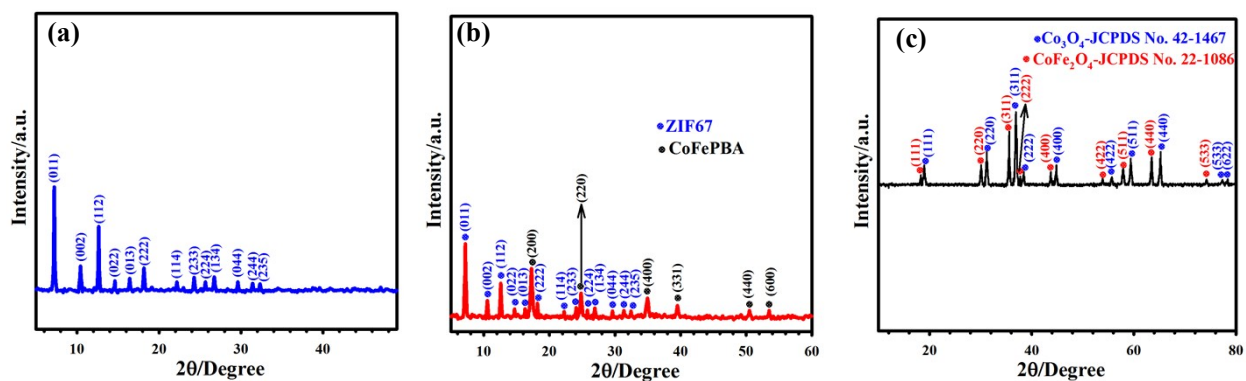

**Fig. S10** (a) XRD pattern of the ZIF67. (b) XRD pattern of the ZIF67@CoFe-PBA. (c) XRD pattern of the  $\text{Co}_3\text{O}_4$ @ $\text{CoFe}_2\text{O}_4$ .

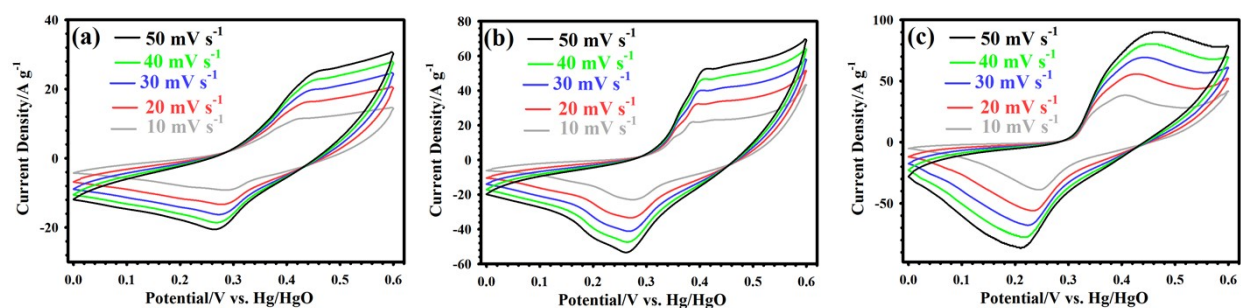

**Fig. S11** (a) CV curves of the ZIF67 from 10 to 50  $\text{mV s}^{-1}$ . (b) CV curves of the ZIF67@CoFe-PBA from 10 to 50  $\text{mV s}^{-1}$ . (c) CV curves of the  $\text{Co}_3\text{O}_4$ @ $\text{CoFe}_2\text{O}_4$  from 10 to 50  $\text{mV s}^{-1}$ .



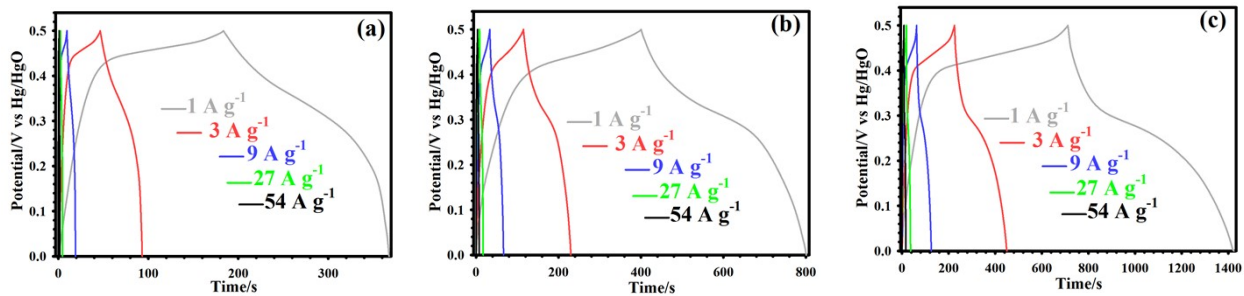

**Fig. S12** (a) GCD curves of the ZIF67 from 1 to 54 A g<sup>-1</sup>. (b) GCD curves of the ZIF67@CoFe-PBA from 1 to 54 A g<sup>-1</sup>. (c) GCD curves of the Co<sub>3</sub>O<sub>4</sub>@CoFe<sub>2</sub>O<sub>4</sub> from 1 to 54 A g<sup>-1</sup>.

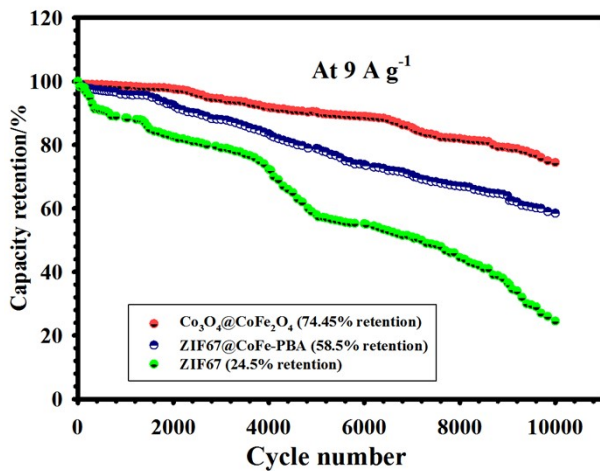

**Fig. S13** Longevity of the ZIF67, ZIF67@CoFe-PBA, and Co<sub>3</sub>O<sub>4</sub>@CoFe<sub>2</sub>O<sub>4</sub> electrodes at 9 A g<sup>-1</sup>.

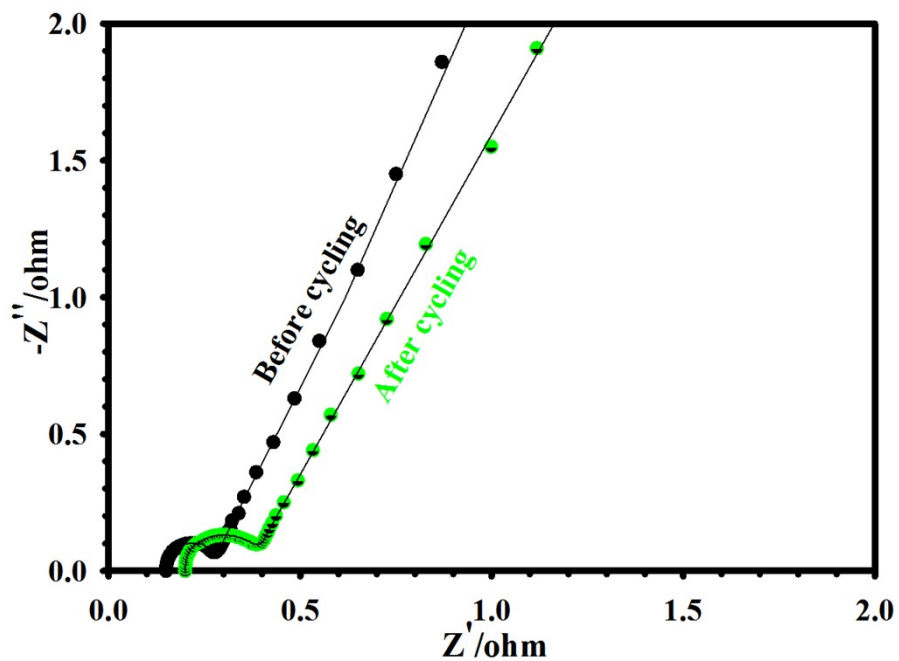

Fig. S14 EIS curves of the CoTe@CoFeTe before and after 10000 cycles.

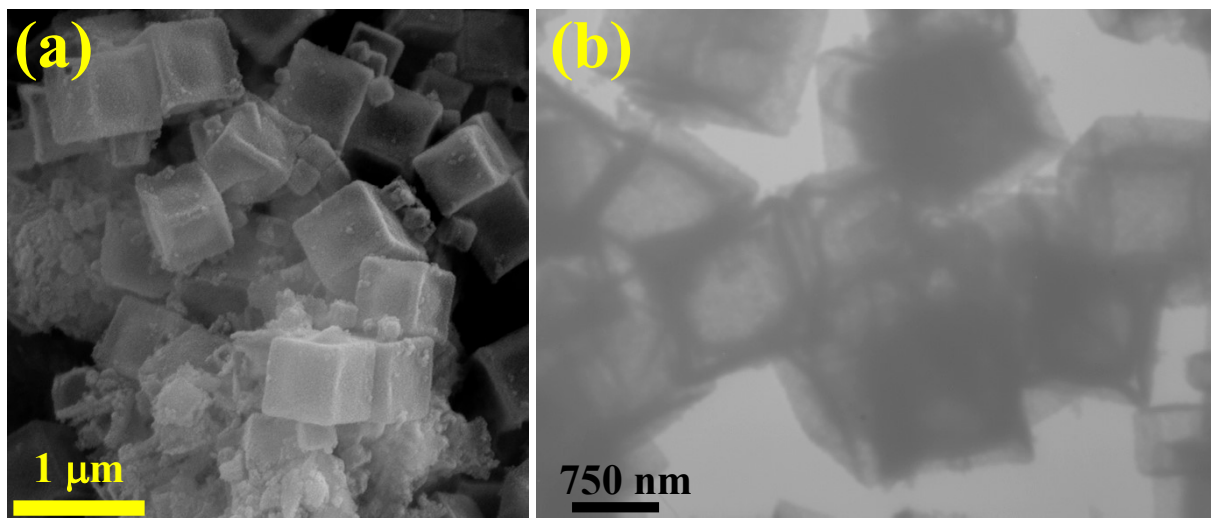

Fig. S15 (a) FE-SEM image of the CoTe@CoFeTe after 10000 cycles. (b) TEM image of the CoTe@CoFeTe after 10000 cycles

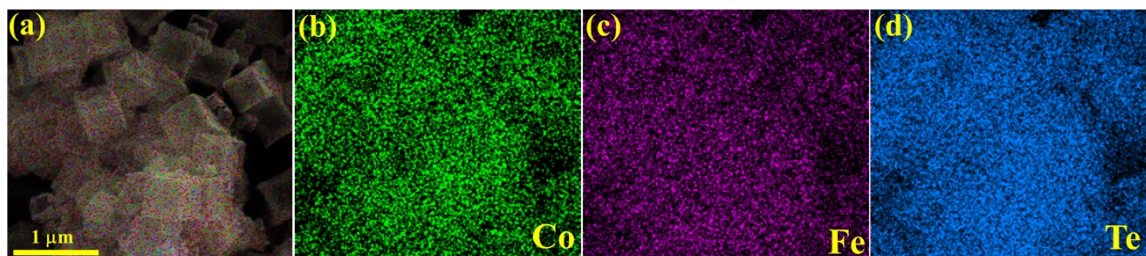

**Fig. S16** FESEM mapping images of the CoTe@CoFeTe after 10000 cycles.

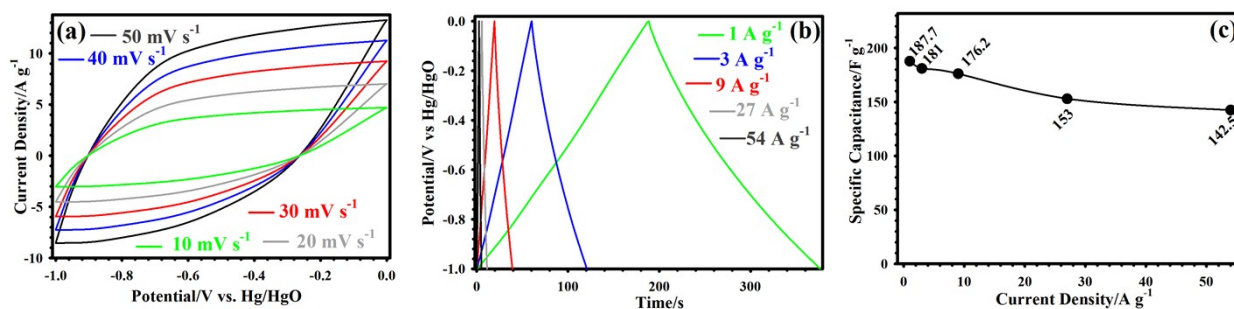

**Fig. S17** (a) CV plots of the AC from 10 to 50 mV s<sup>-1</sup>. (b) GCD plots of the AC from 1 to 54 A g<sup>-1</sup>. (c) Rate capability of the AC electrode.

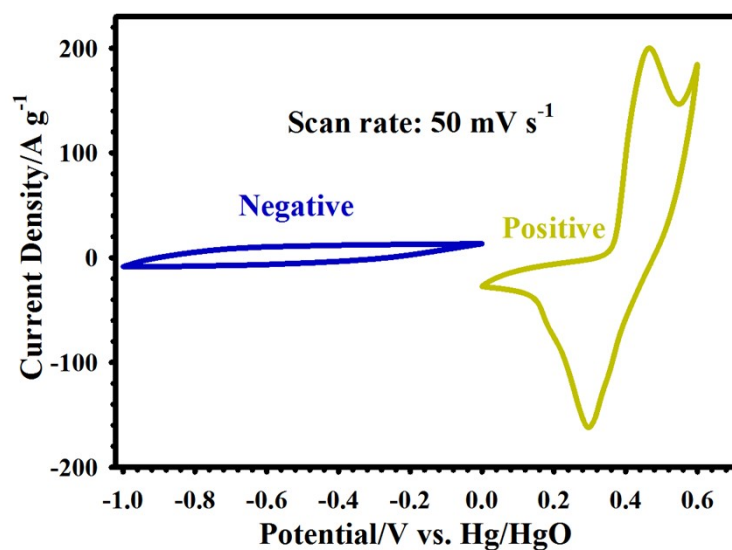

**Fig S. 18** CV plots of AC (anode electrode) and CoTe@CoFeTe (cathode electrode) at 50 mV s<sup>-1</sup> in three-electrode cell.



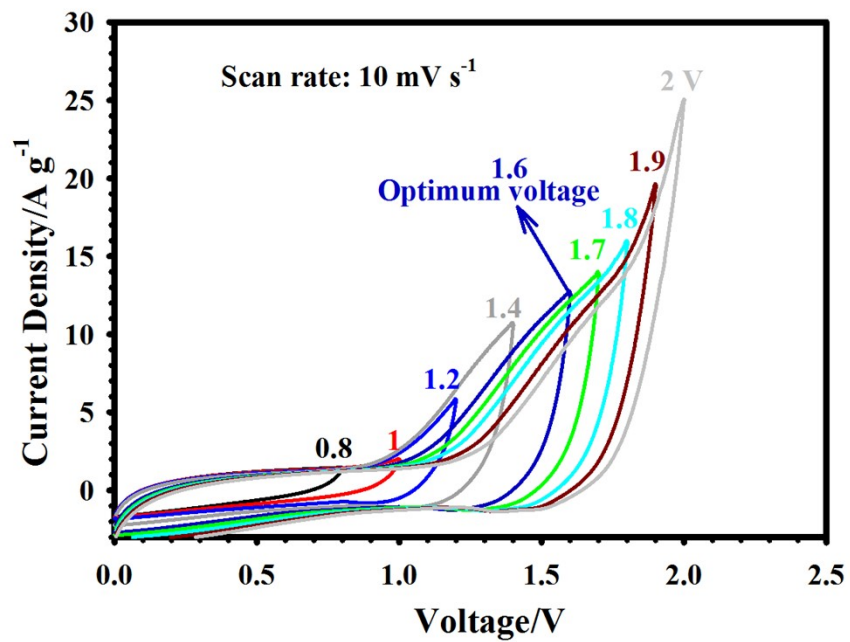

**Fig. S19** CV plots of the AC//CoTe@CoFeTe at various potential window at  $10 \text{ mV s}^{-1}$  from 1.0 to 2.0 V.

**Table S1.** Comparison of the performance of the CoTe@CoFeTe with other previously reported electrode

| Composition                                                          | Capacity (C/g)                | Cycles, retention  | Rate capability               | ED (Wh kg <sup>-1</sup> ) | Reference  |
|----------------------------------------------------------------------|-------------------------------|--------------------|-------------------------------|---------------------------|------------|
| Ni <sub>0.33</sub> Co <sub>0.67</sub> Te                             | 472.3 at 1 A g <sup>-1</sup>  | 5000, 92%          | 60.4% at 20 A g <sup>-1</sup> | 54                        | 1          |
| CoTe                                                                 | 354 at 1 A g <sup>-1</sup>    | 5000, 76.9%        | 90.2% at 20 A g <sup>-1</sup> | 32.9                      | 2          |
| NiCoSe/G                                                             | 421.3 at 1 A g <sup>-1</sup>  | 5000, 84.6%        | 53% at 30 A g <sup>-1</sup>   | 40.4                      | 3          |
| rGO-CCSe                                                             | 724 at 1 A g <sup>-1</sup>    | 6000, 91.5%        | 71% at 60 A g <sup>-1</sup>   | 57.8                      | 4          |
| CuSe@MnSe                                                            | 635.32 at 1 A g <sup>-1</sup> | 7000, 91.62%       | 60.3% at 30 A g <sup>-1</sup> | 19.4                      | 5          |
| Ni <sub>3</sub> Se <sub>2</sub>                                      | 440.55 at 1 A g <sup>-1</sup> | 10000, 80.2%       | 53.3% at 20 A g <sup>-1</sup> | 38.4                      | 6          |
| (Ni <sub>0.85</sub> Se) <sub>3</sub> (Co <sub>0.85</sub> Se)/<br>rGO | 1004.5 at 1 A g <sup>-1</sup> | 5000, 79.7%        | 78.8% at 20 A g <sup>-1</sup> | 38                        | 7          |
| Ni <sub>0.85</sub> Se@MoSe <sub>2</sub>                              | 387 at 1 A g <sup>-1</sup>    | 1000, 95%          | 63% at 15 A g <sup>-1</sup>   | 25.5                      | 8          |
| CoTe@CoFeTe                                                          | 1312 at 1 A g <sup>-1</sup>   | 10000, 92.35 (3 E) | 80% at 54 A g <sup>-1</sup>   | 64.66                     | This study |

materials.

## References

- 1 S. Zhang, D. Yang, M. Zhang, Y. Liu, T. Xu, J. Yang and Z.-Z. Yu, *Inorg. Chem. Front.* 2020, **7**, 477–486.
- 2 M. Xiao, Y. Su, M. Zhao and B. Du, *Nanotechnology*, 2020, **31**, 55706.
- 3 Y. Wang, F. Mo and X. Wu, *J. Electroanal. Chem.* 2020, **924**, 116863.

- 4 S. E. Moosavifard, A. Mohammadi, M. Ebrahimnejad Darzi, A. Kariman, M. M. Abdi and G. Karimi, *Chem. Eng. J.*, 2021, **415**, 128662.
- 5 G. Tang, X. Zhang, B. Tian, P. Guo, J. Liang and W. Wu, *Chem. Eng. J.*, 2023, **471**, 144590.
- 6 Y. Liu, Q. Xu, R. Wang, Y. Zheng, L. Zhu, Z. Wang and W. Zheng, *J. Mater. Chem. A* 2020, **8**, 797–809.
- 7 T. Zhou, S. Tang, H. Yu, L. Shen, Q. Huang, S. Yang, L. Yu and L. Zhang, *New J. Chem.* 2022, **46**, 10328–10338.
- 8 H. Peng, C. Wei, K. Wang, T. Meng, G. Ma, Z. Le and X. Gong, *ACS Appl. Mater. Interfaces* 2017, **9**, 17067–17075.
